# Supplementary material for: Intrathecal T‐cell clonal expansions in patients with multiple sclerosis
Source: PubMed Central journal article supplement (PMC4891996; doi:10.1002/acn3.310), 2016-04-20
Supplement: ACN3-3-422-s001.pdf [file ACN3-3-422-s001.pdf]

## Supplementary Section

Table S1

| Subject | Sample | Number of total reads | TCR in-frame reads | In-frame (%) | Richness | Shannon Diversity |
|---------|--------|-----------------------|--------------------|--------------|----------|-------------------|
| MS-1    | CSF    | 4,716,699             | 3,403,760          | 72           | 1009     | 0.49              |
|         | PB     | 2,874,781             | 1,889,915          | 65           | 15,641   | 0.59              |
| MS-2    | CSF    | 1,727,277             | 1,340,061          | 77           | 562      | 0.41              |
|         | PB     | 3,705,066             | 2,498,859          | 67           | 19,937   | 0.50              |
| MS-3    | CSF    | 8,211,199             | 5,602,060          | 68           | 992      | 0.49              |
|         | PB     | 1,787,395             | 1,376,469          | 77           | 22,302   | 0.64              |
| MS-4    | CSF    | 3,796,044             | 2,630,387          | 69           | 677      | 0.40              |
|         | PB     | 5,899,141             | 4,210,771          | 71           | 10,908   | 0.58              |
| MS-5    | CSF    | 1,482,178             | 1,128,776          | 76           | 1,800    | 0.58              |
|         | PB     | 7,808,614             | 5,169,968          | 66           | 28,877   | 0.56              |
| IIH-1   | CSF    | 2,500,116             | 1,544,754          | 61           | 1,324    | 0.36              |
|         | PB     | 3,253,121             | 2,121,313          | 65           | 8,540    | 0.40              |
| IIH-2   | CSF    | 4,513,018             | 3,143,787          | 69           | 129      | 0.22              |
|         | PB     | 3,310,342             | 2,267,938          | 68           | 4,370    | 0.46              |
| IIH-3   | CSF    | 1,707,293             | 727,561            | 42           | 778      | 0.34              |
|         | PB     | 4,373,604             | 3,328,922          | 76           | 8,611    | 0.49              |
| IIH-4   | CSF    | 2,394,998             | 1,200,920          | 50           | 1,878    | 0.35              |
|         | PB     | 4,749,025             | 2,979,790          | 62           | 11,567   | 0.26              |
| IIH-5   | CSF    | 6,637,032             | 4,469,764          | 67           | 1,774    | 0.42              |
|         | PB     | 6,698,455             | 4,804,131          | 71           | 11,996   | 0.57              |

N

o statistic differences was found in comparison of the total numbers of TCR $\beta$  sequencing in-frame reads between PB (P=0.93) and CSF (P=0.58) counts of MS patients and IIHcontrols (unpaired T-test with Mann-Whitney correction) and between PB and CSF counts for all subjects (parametric paired T-test, P=0.47). For the analysis of Richness and Shannon Diversity data please see Fig.1.

## Table S2

1. CASSTYNEQFF
2. CSARNGLPDETQYF
3. CASRGGARGQETQYF
4. CASSLHTRVQETQYF
5. CASSPGTSYEQYF
6. CASSQRLAGSTDTQYF
7. CASSSLAGYEQYF
8. CASSYSLADSYEQYF

## Table S3

1. CASSSGLGGYEQYF
2. CASSSYNEQFF
3. CSAIAGGAGSYEQYF
4. CASSLNSGRITSEQYF
5. CASTLAGGTYEQYF
6. CATSDPGQGRGETQYF
7. CASSLFNPEEETQYF
8. CASHEDGNTIYF
9. CASKIQQGGGSPLHF
10. CASSLGLAGGTDQYF
11. CASSALVGSGRKNEQFF
12. CASSNQQGANeklff
13. CASGSYGTSGGEQYF
14. CASSTGDATNEKLFF
15. CASSVGGGASGMYNEQFF
16. CATSDLATSGRGEQFF
17. CASTAMQAIRGTQYF
18. CASSLEFPGTGGGEQYF
19. CASSFVTVRESYTF
20. CASSDRGGNQPQHF
21. CASRSRQFSEQYF
22. CASTTGRSSYEQYF
23. CASSQDSTDQYF
24. CASGDRGANTGELFF
25. CATSDLSLDYNEQFF
26. CASSYAPGDTQYF
27. CASSEDGARVLGNTIYF
28. CASSVAGGQPQHF
29. CASSLGRVFGSEQYF
30. CASSWDRRGTQYF
31. CASSFGGSYEQYF
32. CASSPRRQGANYGYTF
33. CASSRVGTDQYF
34. CASSEASGNDEQFF
35. CASSQETETQYF
36. CASDRDRVNSPLHF
37. CASRISGSGTGELFF
38. CASSERLTDEQFF
39. CASRRSRSQETQYF
40. CASSQELAGVADTQYF
41. CASSRQINYGYTF
42. CASSPGGKGGNQPQHF
43. CAISDGDRPYSEQYF
44. CSAPLAGGTDQYF
45. CASSLGGARGYTF
46. CASSFYSGAGSFF
47. CSAGQGETQYF
48. CSDSTGDGYGYTF
49. CASRETGFQFF
50. CASSQTDGYTF
51. CSATDSYGYTF
52. CASSLAGTLNEQFF
53. CASSGLGSSERTDQYF
54. CSARRAQQSDTQYF
55. CASSFSWGQETQYF
56. CASSSHDLAGGYEQFF

57. CASRRTPPPGQGSEKLFF  
58. CASRDSSTDTQYF  
59. CASSQENEKLFF  
60. CASSVRRTDEQFF  
61. CASSPGRSGYTF  
62. CATSDSGTAYEQYF  
63. CASSGQLTISAQHF  
64. CASSLGQGPNQPHF  
65. CASSLTERGRDTQYF  
66. CASSLAGVGNEQFF  
67. CASSQRVASSGTYNEQFF  
68. CASRPGGAADTQYF  
69. CASSSGRTGSGYNEQFF  
70. CASSQDEGQFHSYEQYF  
71. CSAVRAHGYTF  
72. CASSAQGYEQYF  
73. CASSDEQGRGYTQYF  
74. CARPLSGGAGGELFF  
75. CASSTVAVHEQYF  
76. CASKRRDGTGELFF  
77. CASSLSGYNEQFF  
78. CASSYLTSGSADTQYF  
79. CSARGLAGGDTQYF  
80. CASSLDRRASGNTIYF  
81. CASSWGLAGLGNEQFF  
82. CASSSTGTSTDTQYF  
83. CASSLSGQLAYTF  
84. CASSLAGQGSNEKLFF  
85. CASSGTSGPYHEQFF  
86. CASSQDRYRTNEKLFF  
87. CASSPYFLGSSYNEQFF  
88. CAPWEGPGVHYGYTF  
89. CASTPAGGTGGGYTF  
90. CASSLAGGSTGELFF  
91. CSASGSQSSYNEQFF  
92. CASSLPSRGNEQFF  
93. CASSTYNEQFF  
94. CASSLHTRVQETQYF  
95. CASSLEPISNEQFF  
96. CASSSENRTNYGYTF  
97. CASSLDGTERSIEQYF  
98. CASSLSYGGANYGYTF  
99. CASSYDRDTGELFF  
100. CSARDAGGSDRETQYF  
101. CASSFAGGGEQYF  
102. CASRQTDWHNEQFF  
103. CATMGSGLSYEQYF  
104. CASSFRVQETQYF  
105. CASSLLGQINEQYF  
106. CASSTTPGLSQETQYF  
107. CASSYRPQNYPEQFF  
108. CASGSGTGGAHEDTQYF  
109. CSVLGQGSANVLT  
110. CASRSILITYNEQFF  
111. CASSLPGGPDPDTQYF  
112. CASSPPFSRLGEQFF  
113. CASSRTGAGELFF  
114. CASSSWGENDEQFF  
115. CASSLISQLYEQYF

116. CASRGTRGEQYF  
117. CASSPTSGPSSYEQYF  
118. CAGSTGPYEQYF  
119. CASSQGASGWSSYEQYF  
120. CSARGRTGDTGELFF  
121. CASRTGLAGNNEQFF  
122. CASSLMDSNQPHF  
123. CATSDPGTSGFYEQYF  
124. CASSSGLARQETQYF  
125. CASSSRGTTDTQYF  
126. CASSSFSSYEQYF  
127. CASSVDRGQETQYF  
128. CASSLSPGAGETQYF  
129. CASIGTAYTGELFF  
130. CASSPGQGGYTF  
131. CASSLRQGAYNEQFF  
132. CASSSRDKRHEQFF  
133. CASSRDGESSYEQYF  
134. CASSLGGREQFF  
135. CASSQAIQGGGDTQYF  
136. CASSRKQGLQETQYF  
137. CASSLGVGGRIEQYF  
138. CASSGQQETQYF  
139. CASSLSSGTITDTQYF  
140. CASSQRTGSEQYF  
141. CASMGLANTGELFF  
142. CASTFGAGDYEQYF  
143. CASSLSETGELFF  
144. CASSRQGMNTGELFF  
145. CASSYSLADSYEQYF  
146. CASSVGYNEQFF  
147. CAWSVRGYEQYF  
148. CASSLGYQGPTDTQYF  
149. CASREGAYNEQFF  
150. CSVEVGQGREQYF  
151. CASSQDGAGLTGELFF  
152. CSARGHTGVAGELFF  
153. CATSRPGQGVQTQYF  
154. CASRGGARGQETQYF  
155. CASSPGTSYEQYF  
156. CASSLEGRAPQPQHF  
157. CSANMVGGNYNEQFF  
158. CASSAYDRGTEQFF  
159. CASSTGTGTTDTQYF  
160. CSVEGLATFSTQYF  
161. CASSSEQNQPHF  
162. CASRIEGSSYNEQFF  
163. CASSQRLAGSTDTQYF  
164. CASSKDWGGSSYNEQFF  
165. CSAPTSGGPDTQYF  
166. CASSPRQGHEQFF  
167. CASSSLAGYEQYF  
168. CASSQITLTSGISEQYF  
169. CSAQRRQIDTQYF  
170. CASSAPDSSYEQYF  
171. CAISDHLSYEQYF  
172. CSALQGASTDTQYF  
173. CASSLTGRGYGYTF  
174. CAISDLRQGRQDEQFF

175. CASSFTDTQYF  
176. CASSFSHSYEQYF  
177. CSAARTVETQYF  
178. CSVEDPGTSANSYNEQFF  
179. CASSQAEDLVEQYF  
180. CASSELASTPGTDTQYF  
181. CASSPTGYEQYF  
182. CASSLEPGRNEKLFF  
183. CASSLGGGISYEQYF  
184. CASSLGGFATQYF  
185. CASSPLAGGTYNEQFF  
186. CASSPGYSGYEQYF  
187. CASTPVFGSWDGYTF  
188. CASSQDHYGGRTNEQFF  
189. CASSSGGASTDTQYF  
190. CASSPGAGMKETQYF  
191. CASTSPAGSGGPRSSYNEQFF  
192. CASSLGQGQYNEQFF  
193. CASSLGVSGSSYNEQFF  
194. CASSLGGPRDTQYF  
195. CASSFKSVASSTDTQYF  
196. CASSQVEGQETQYF  
197. CASSSQGRDNRQPQHF  
198. CSARGSEDTGELFF  
199. CSASPQINEQFF  
200. CASSEGAENQPQHF  
201. CASSAGSPWANGNYGYTF  
202. CASSPQTGTGYGYTF  
203. CASSQDRYRQNTAEFF  
204. CASSLRENYGYTF  
205. CASSPTRGFYNEQFF  
206. CASSSKGTGLAEYEQYF  
207. CASSLVPTSGGVVAEQFF  
208. CASSLSGASYEQYF  
209. CASSHRVGVSYEQYF  
210. CASSSRTGVHSNQPQHF  
211. CASSFQLSGSSYNEQFF  
212. CASSELTSEKLFF  
213. CASSESDLGSTDQYF  
214. CASRVRGANTGELFF  
215. CASSQELGTGGRGYTF  
216. CASRPTTFQETQYF  
217. CSARVYSGRGVVSGRDGEQFF  
218. CASSAGPGGYGYTF  
219. CASSANMGTLTDTQYF  
220. CASSFPSLAGVSYNEQFF  
221. CASRPRGLADERGTQYF  
222. CASRLSGSSYNEQFF  
223. CASSLNLAGGHYNEQFF  
224. CASSYGWSSYNEQFF  
225. CASSPTVHTDTQYF  
226. CASSLSASGSFLTGEQYF  
227. CAILIGWQQFF  
228. CASSEEAQWVYEQYF  
229. CSARFAGTTYNEQFF  
230. CSATGLLASYEQYF  
231. CASSVYRVPGEKLFF  
232. CASSLAGVAGDYNEQFF  
233. CASSPGTGEGYEQFF

234. CASSLVGREQYF  
235. CASSGHSNQPQHF  
236. CASTLGQGIFYEQYF  
237. CASSWGGGDQPQHF  
238. CASRLIDRRNQPQHF  
239. CASSYSDWTLEPQHF  
240. CASSSWTDSYEQYF  
241. CASSPASGGFYNEQFF  
242. CSVPLFTGELFF  
243. CSVEEGQTTDTQYF  
244. CASSLSGQRVYEQYF  
245. CASSLGGQGVLSDGYTF  
246. CASSLMSGKREEEYF  
247. CASRNDPSGDEQFF  
248. CASDRAGGSGELFF  
249. CASRPGLAAYNEQFF  
250. CASSLVGLEQYF  
251. CASSFWTSGSNEQFF  
252. CASSTSGGSYNEQFF  
253. CASSFPGVHEQYF  
254. CASSLLDLSGANVLT  
255. CASSQALGLAGGEQYF  
256. CASSRQSGLSYEQYF  
257. CASSQAGGGYNEQFF  
258. CASSPRGFRGPGEKLF  
259. CASSARYEQYF  
260. CASSLDPGRLTYEQYF  
261. CASSLLDLSGANGLT  
262. CASSFPGLNEQYF  
263. CASSLRNSETQYF  
264. CASRPQGRSSTDTQYF  
265. CASTLAGQETQYF  
266. CSARAAGPLGFLSLDYTQYF  
267. CSARDVGGLSGTQYF  
268. CASSQWQGSADTQYF  
269. CASSLVGSSTDTQYF  
270. CASSSNGNEQFF  
271. CASSYGGPGDEQFF  
272. CSVDGTSGNTDTQYF  
273. CSVEWVVNYGYTF  
274. CASRPSDRGTYEQFF  
275. CASSYSQGTADTQYF  
276. CATSRDGTSGGDTQYF  
277. CASSAGTYTF  
278. CASQQGSGSYEQYF  
279. CASSLALDWEQFF  
280. CSARNGLPDETQYF  
281. CASSSNLAGGNSYEQYF  
282. CASSLGAGGSTQYF  
283. CASSLKDTQYF  
284. CATRDTDGLAGGYEQYF  
285. CASSHPPGGTEQYF  
286. CASSVDGTYGYTF  
287. CASSSRLAGVGETQYF  
288. CASSSLPPKVNEQFF  
289. CASSEAGPLSGANVLT  
290. CSALGQGAYNEQFF  
291. CASSPGPGNEQFF  
292. CASSLGQPYGYTF

293. CASRKGQGANQPQHF
294. CASSSLADSYNEQFF
295. CASSPRGWEGSYNEQFF
296. CASSQALGTQYF
297. CASSFGTSNTDTQYF
298. CASSFRGEGYEQYF

## Table S4

1. CARPLSGGAGGELFF
2. CASSSTGTSTDTQYF
3. CASSTYNEQFF
4. CASSLHTRVQETQYF
5. CASIGTAYTGELFF
6. CASSSRDKRHEQFF
7. CASSQAIQGGGDTQYF
8. CASSYSLADSYEQYF
9. CASSVGYNEQFF
10. CASSLGYQGPTDTQYF
11. CASREGAYNEQFF
12. CSVEVGQGREQYF
13. CASSQDGAGLTGELFF
14. CASRGGARGQETQYF
15. CASSPGTSYEQYF
16. CASSLEGRAPQPQHF
17. CASSQRLAGSTDTQYF
18. CASSKDWGGSSYNEQFF
19. CASSSLAGYEQYF
20. CASSPGYSGYEQYF
21. CASTSPAGSGGPRSSYNEQFF
22. CASSLRENYGYTF
23. CASSPTRGFYNEQFF
24. CASSLVPTSGGVVAEQFF
25. CASSELTSEKLFF
26. CAISDPTGQGGIYEQYF
27. CASSRTPASGRADTQYF
28. CSARHLGDGYTF
29. CASSLMGAQPQHF
30. CASSQELGTGGRGYTF
31. CASSFSVLTDQYF



32. CSASPTGGEQYF  
33. CSASRSGWATGLDQPQHF  
34. CASSSTGSGEQYF  
35. CASSSPLGSLTDTQYF  
36. CASSRQNGYTF  
37. CASSLASGRSYEQYF  
38. CASSQQIGARLSYNEQFF  
39. CASSLGAGLGEKLFF  
40. CASSLIQINTIYF  
41. CSASVTWGLLPFSGNTIYF  
42. CASSVDGQGYEQYF  
43. CASSLGVQNGELFF  
44. CASSDRDEQFF  
45. CASSTGTENYGYTF  
46. CASSGTGDSYNEQFF  
47. CASSPQGAETQYF  
48. CASRPTTFQETQYF  
49. CASSVPNNEQFF  
50. CASSQPRGQGAASGPNEQFF  
51. CASSLAPRDEDEQFF  
52. CASSLAGLYEQFF  
53. CSARVYSGRGVVSGRDGEQFF  
54. CASSLYGGSWETQYF  
55. CASSLMGGGGPVGQYF  
56. CASSSKQGWYEQYF  
57. CASIGGRGGLTQYF  
58. CSANPSTSGPPDTQYF  
59. CASSRYRETNEKLFF  
60. CASSPTKTGELFF  
61. CASSGGTGNQPQHF  
62. CASSVEPLAVPREQYF  
63. CASGGWREEGETQYF  
64. CASRETQGALHEQFF  
65. CASSAGPGGYGYTF  
66. CASSLSMWDEQYF  
67. CASSAIGGITDTQYF  
68. CSASPVERDLYEQYF  
69. CASSLADRPAYEQYF  
70. CASSDTTSYEQYF  
71. CATSRLRTGSGDEQYF  
72. CASRLRVGNEKLFF  
73. CASSARGQATYEQYF  
74. CASSSPIEGGDTQYF  
75. CASSVYGTSRKGEQYF  
76. CASSLAGGNHNEQFF  
77. CASSLGQGISGNTIYF  
78. CASRLTGGGNQPQHF  
79. CAISEGQGAETQYF  
80. CSASQGAVTDTQYF  
81. CASTTWGDSNSPLHF  
82. CASSLPQGKNEQYF  
83. CASSLVTGAGNQPQHF  
84. CASSPLAGIYEQFF  
85. CASSLRRGGMETQYF  
86. CASSSLYRAQGTQYF  
87. CASSLAGTKTGNTIYF  
88. CASSQLRGSTNTGELFF  
89. CASSANMGTLTDTQYF  
90. CASSFPSLAGVSYNEQFF

91. CAINIGTGRQETQYF  
92. CASSQEWRGYSYEQYF  
93. CASSSGTGGADTQYF  
94. CASSQDPPSGANTGELFF  
95. CASSSGAGQGNEQYF  
96. CASSQREGTSGKKQFF  
97. CASSQALGQTFSGNTIYF  
98. CASSLLAGVADTQYF  
99. CASRPRGLADERGTQYF  
100. CASSFSGDSYNEQFF  
101. CASSVRTSGSTGELFF  
102. CASSPVTGTNTGELFF  
103. CASSLWDRVIYNEQFF  
104. CASRGRVVQETQYF  
105. CASSPELAGGHEQYF  
106. CASSLGMREGFYNEQFF  
107. CATSRDRGGWYGTYF  
108. CASSLAGAPYNEQFF  
109. CASSLEADSYNEQFF  
110. CASSSQREGIGELFF  
111. CASSRLAGVYEQYF  
112. CASRLSGSSYNEQFF  
113. CASSLLTSGNTGELFF  
114. CASSLNLAGGHYNEQFF  
115. CASSYQVRDSYNEQFF  
116. CASSYGWSSYNEQFF  
117. CASNLQGKGSPLHF  
118. CASSSISGRAIETQYF  
119. CASSLVPGTGEGETQYF  
120. CASSPVRAVAEKLFF  
121. CASSRRRRETTKETQYF  
122. CASSQNFRSAQYF  
123. CSAEEGTDQYF  
124. CASSFLGGSGYTF  
125. CASSSLKGSGRPDTQYF  
126. CASSPTVHTDTQYF  
127. CASSLRRGNNEQFF  
128. CASSLGTGQETQYF  
129. CASSLSASGSFLTGEQYF  
130. CAILIGWQQFF  
131. CASSLIGTGTETQYF  
132. CASSESGTIGETQYF  
133. CASSLEPAKNIQYF  
134. CASSPFREVDNEQFF  
135. CASRPSGGRAGNEQFF  
136. CASSEEAQWVYEQYF  
137. CSARFAGTTYNEQFF  
138. CASSSGTGGSGNIQYF  
139. CASSPRGLAGGSETQYF  
140. CASSSPDYNEQFF  
141. CSATGLLASYEQYF  
142. CASSPLSGEQYF  
143. CATSDFYSGFYEQFF  
144. CASSVYRVPGEKLFF  
145. CASSVAGDGTDTQYF  
146. CASSLWTGIEQFF  
147. CASSQESWQYSYNEQFF  
148. CASRHELGTGGTNPVYNEQFF  
149. CASSLARTSGSMETQYF

150. CASSLGLAGHDNEQFF  
151. CASSLAGVAGDYNEQFF  
152. CASRKDRGLSPYTDQYF  
153. CATSRAKGGGSSYEQYF  
154. CASSEGPIIEQFF  
155. CSAKRDRTDTQYF  
156. CASSLEGRGQETQYF  
157. CASSVTGTGYGYTF  
158. CSATLREPYEQYF  
159. CASTLQGKGTQYF  
160. CAISDPGPGNTIYF  
161. CASSLFDVPTGELFF  
162. CASSLSGYEQYF  
163. CASSWDRTEGYEQYF  
164. CASSPSGRASYEQYF  
165. CATSREGGETQYF  
166. CASKYGRTSLSRETQYF  
167. CASSSHRSSYEQYF  
168. CATSRDRGYEQYF  
169. CASSLVWTDQYF  
170. CASSWGGLEPNEQFF  
171. CSARVVAGEGKKDTQYF  
172. CASTLDRVYEDTQYF  
173. CASSEPGGSNEQFF  
174. CASSRTSGTLYNEQFF  
175. CASSLVGREQYF  
176. CASSLAGGSPTGELFF  
177. CASSGHSNQPQHF  
178. CASTLGQGIFYEQYF  
179. CASSWGGGDQPQHF  
180. CASRLIDRRNQPQHF  
181. CASSYSDWTLEPQHF  
182. CASSSWTDSYEQYF  
183. CASSPASGGFYNEQFF  
184. CASSLVVSEQFF  
185. CSVPLFTGELFF  
186. CSVEEGQTTDTQYF  
187. CASSLSGQRVYEQYF  
188. CASSLGGQGVLSDGTYF  
189. CASSLMSGKREEEYF  
190. CASRNDPSGDEQFF  
191. CASDRAGGSGELFF  
192. CASRPGLAAYNEQFF  
193. CASSSTGELFF  
194. CASSLVGLEQYF  
195. CASSFWTSGSNEQFF  
196. CASSSGTGPKQPQHF  
197. CASSFPGVHEQYF  
198. CASSLLDLSGANVLTF  
199. CASSQALGLAGGEQYF  
200. CASSRQSGLSYEQYF  
201. CASSQAGGGYNEQFF  
202. CASSPRGFRGPGEKLFF  
203. CASSARYEQYF  
204. CASSLDPGRLTYEQYF  
205. CASSLLDLSGANGLTF  
206. CASSFPGLNEQYF  
207. CASSLEGGTDTQYF  
208. CASRATPAGHGTYF

209. CASRSSGDTDTQYF  
210. CASSRPGQGDTEAFF  
211. CSARDRGLTYEQYF  
212. CASARGGNQPQHF  
213. CASSQDWGASGGVGETQYF  
214. CASRPQGRSSTDTQYF  
215. CASSSRDARETQYF  
216. CASTLAGQETQYF  
217. CSARAAGPLGFSLDYTQYF  
218. CSARDVGGLSGTQYF  
219. CASSEPLAEETQYF  
220. CSAPGQGTDTQYF  
221. CASSQWQGSADTQYF  
222. CASSQEIAGSYTF  
223. CASSLVGSSTDTQYF  
224. CASRTGAATNEKLFF  
225. CASRPEQRSNQPQHF  
226. CASSSNGNEQFF  
227. CASSYGGPGDEQFF  
228. CASSERGSQETQYF  
229. CASSLERQHQETQYF  
230. CASSGPGTPSETQYF  
231. CASSLSPGTGYEQYF  
232. CASSLYKGENEQFF  
233. CASRPSDRGTYEQFF  
234. CSVESGTSAYNEQFF  
235. CATSKLQAVSGELFF  
236. CASSAGTYTF  
237. CASQQGSGSYEQYF  
238. CSARNGLPDETQYF  
239. CASSSGNTIYF  
240. CASDQGVNSEQYF  
241. CASSLKDTQYF  
242. CATRDTDGLAGGYEQYF  
243. CASSHPPGGTEQYF  
244. CASSVDGTYGYTF  
245. CASSSLPPKVNEQFF  
246. CASSEAGPLSGANLTF  
247. CASSEAGPLSGANVLT  
248. CASSPGPGNEQFF  
249. CASSLGQPYGYTF  
250. CASSSLADSYNEQFF  
251. CASSPRGWEGSYNEQFF  
252. CASSQALGTQYF
